# Supplementary material for: Inhibition of arsenite methylation induces synergistic genotoxicity of arsenite and benzo(a)pyrene diol epoxide in SCC-7 cells
Source: Royal Society of Chemistry journal article supplement (doi:10.1039/c8mt00217g), 2018-10-30
Supplement: c8mt00217g1.pdf [file c8mt00217g1.pdf]

## Electronic Supplementary Information

### **Inhibition of arsenite methylation induces synergistic genotoxicity of arsenite and benzo(a)pyrene diol epoxide in SCC-7 cells**

Youxian Li, Man He, Beibei Chen\*, Bin Hu\*

Key Laboratory of Analytical Chemistry for Biology and Medicine (Ministry of Education), Department of Chemistry, Wuhan University, Wuhan 430072, P R China

\*Corresponding Author, Tel: 86-27-68752162, Fax: 86-27-68754067; E-mail: [binhu@whu.edu.cn](mailto:binhu@whu.edu.cn); [bbchen@whu.edu.cn](mailto:bbchen@whu.edu.cn)

#### **Content**

**Table S1** Operation conditions of HPLC-ESI-LTQ-Orbitrap-MS.

**Table S2** Optimized conditions for HPLC-ICP-CCT-MS.

**Table S3** Sequences of primers used for RT-qPCR analysis.

**Table S4** Gene expression in SCC-7 cells exposed to As(III).

**Figure S1** BPDE-mediated DNA damage by comet assay. Representative images of comet assay for analysis of SCC-7 cells treated with 1  $\mu$ M BPDE for 0, 0.5, 1, 2 h (10 $\times$  Objective).

**Figure S2** The exact mass and extraction ion chromatogram of A, T, C, G and BPDE-N<sup>2</sup>-dG and mass spectrum of BPDE-N<sup>2</sup>-dG using HPLC-ESI-LTQ-Orbitrap-MS.

**Figure S3** Effect of BPDE incubation time on the formation of BPDE-N<sup>2</sup>-dG in SCC-7 cells. Semi-quantitative analysis of BPDE-N<sup>2</sup>-dG in SCC-7 cells treated with 1  $\mu$ M BPDE for 0.5 h, 1 h, 2 h and 3 h, respectively, according to representative extracted ion chromatogram of HPLC-ESI-LTQ-Orbitrap-MS. Error bars represent the standard deviation of triplicate experiments.

**Table S1** Operation conditions of HPLC-ESI-LTQ-Orbitrap-MS

---

| <b>HPLC</b>            |                                                                                           |
|------------------------|-------------------------------------------------------------------------------------------|
| HPLC column            | ThermoFisher Acclaim Hypersil GOLD C18 (2.1 × 150 mm, 3 μM)                               |
| Flow rate              | 0.2 mL min <sup>-1</sup>                                                                  |
| Mobile phase           | A: Methanol (MS grade); B: Triple deionized water                                         |
| Gradient elution       | 0-5 min: 3% A, 97% B; 5-8 min: 15% A, 85% B; 8-9 min: 50% A, 50% B; 9-15 min: 3% A, 97% B |
| Column temperature     | 35 °C                                                                                     |
| Injection volume       | 20 μL                                                                                     |
| <b>ESI-Orbitrap-MS</b> |                                                                                           |
| Scan type              | PRM                                                                                       |
| Sheath gas             | 35 arb units                                                                              |
| Aux gas                | 15 arb units                                                                              |
| Heat temperature       | 300 °C                                                                                    |
| Capillary temperature  | 350 °C                                                                                    |
| S-lens RF level        | 50%                                                                                       |
| Spray voltage          | 3500 V                                                                                    |

---

**Table S2** Optimized conditions for HPLC-ICP-CCT-MS

---

| <b>HPLC</b>        |                                                           |
|--------------------|-----------------------------------------------------------|
| HPLC column        | Shiseido CAPCELL PAK C18 (5 $\mu$ m, 4.6 $\times$ 250 mm) |
| Mobile phase       | 4 mM TBAH + 8 mM malonic acid + 3%(v/v) methanol, pH 6.0  |
| Column temperature | 25 $^{\circ}$ C                                           |
| Eluent flow rate   | 1 mL/min                                                  |
| Injection volume   | 40 $\mu$ L                                                |
| <b>ICP-MS</b>      |                                                           |
| Plasma RF power    | 1200 W                                                    |
| Nebulizer gas flow | 0.91 L/min                                                |
| Auxiliary gas flow | 0.8 L/min                                                 |
| Collision gas      | 8% H <sub>2</sub> in He                                   |
| Collision gas flow | 3.6 mL min <sup>-1</sup>                                  |
| Dwell time         | 100 ms                                                    |
| Acquisition mode   | Peak-hopping                                              |
| Isotope            | <sup>75</sup> As                                          |

---

**Table S3** Sequences of primers used for RT-qPCR analysis

| Gene  |         | Primer (5'-3')          |
|-------|---------|-------------------------|
| GAPDH | Forward | TCAACGACCACTTTGTCAAGC   |
|       | Reverse | CCAGGGGTCTTACTCCTTGG    |
| AS3MT | Forward | CGTCTATACGAGAGCCTTGAAC  |
|       | Reverse | AACGACAGTCACCGATAA      |
| MT1A  | Forward | CTCGAAATGGACCCCACT      |
|       | Reverse | ATATCTTCGAGCAGGGCTCGTC  |
| CSB   | Forward | CCCCAGTACAGGTCAAACT     |
|       | Reverse | CTTCATTCTCCGCAGTAGGT    |
| XPC   | Forward | GAAGACTTGGAGTTTCAGGC    |
|       | Reverse | TTCAGGGCATAACAGAGGGTG   |
| XPF   | Forward | CCACTGACACTCGGAAAGCC    |
|       | Reverse | ATGTCAATGCCCGACGATG     |
| XPB   | Forward | ACTCAACCAAGCGGCAGAGATTC |
|       | Reverse | CCACCTCCTCCTCGGCATCC    |
| RAD50 | Forward | GCGTGCGGAGTTTTGGAATA    |
|       | Reverse | TGAGCAACCTTGGGATCGTG    |

**Table S4** Gene expression in SCC-7 cells exposed to As(III).

| Incubation condition        | Gene expression fold change (set GAPDH as reference) |                 |
|-----------------------------|------------------------------------------------------|-----------------|
|                             | AS3MT                                                | MT1A            |
| 2 $\mu$ M As(III) for 24 h  | 1.59 $\pm$ 0.17                                      | 1.01 $\pm$ 0.23 |
| 10 $\mu$ M As(III) for 24 h | 0.34 $\pm$ 0.12                                      | 0.27 $\pm$ 0.13 |

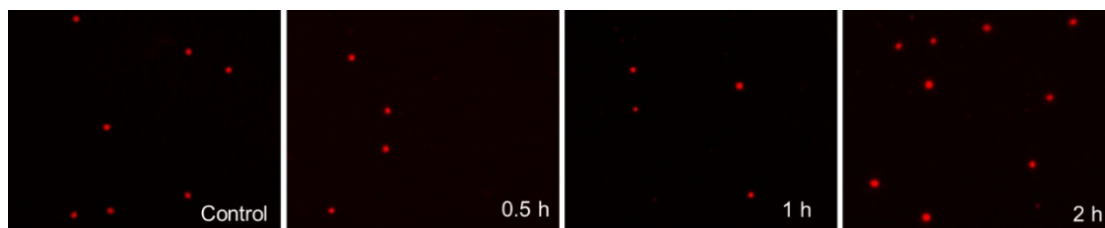

**Figure S1** BPDE-mediated DNA damage by comet assay. Representative images of comet assay for analysis of SCC-7 cells treated with 1  $\mu$ M BPDE for 0, 0.5, 1, 2 h (10 $\times$  Objective).

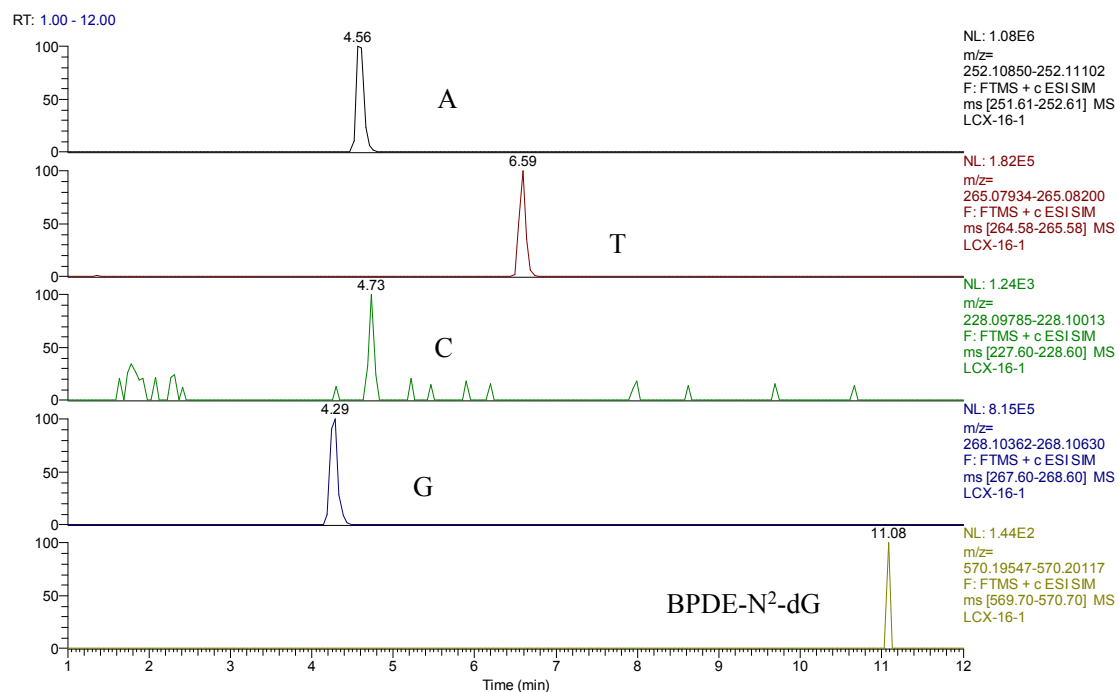

LCX-1-1 #1376-1387 RT: 11.24-11.29 AV: 2 NL: 6.14E1  
 F: FTMS + c ESI SIM ms [569.70-570.70]

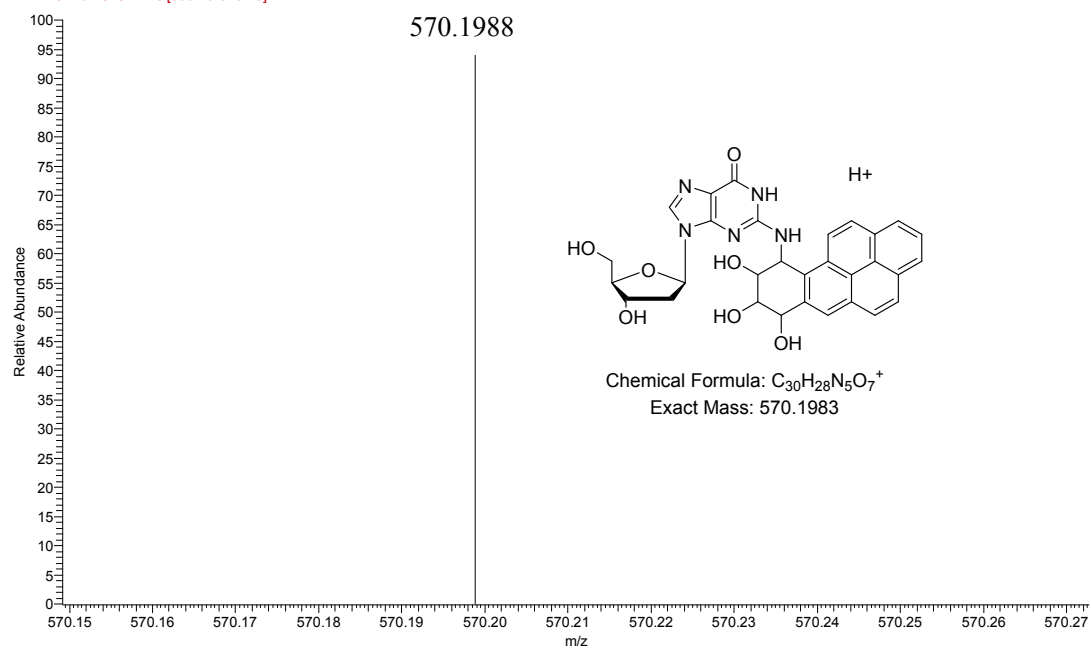

**Figure S2** The exact mass and extraction ion chromatogram of A, T, C, G and BPDE-N<sup>2</sup>-dG and mass spectrum of BPDE-N<sup>2</sup>-dG using HPLC-ESI-LTQ-Orbitrap-MS.

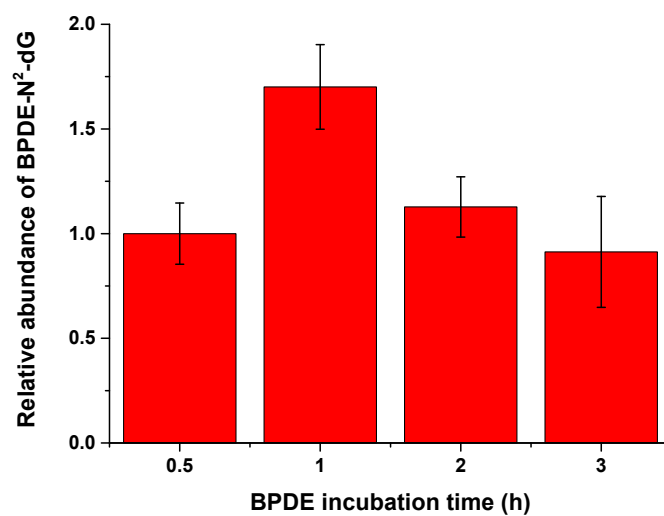

**Figure S3** Effect of BPDE incubation time on the formation of BPDE-N<sup>2</sup>-dG in SCC-7 cells. Semi-quantitative analysis of BPDE-N<sup>2</sup>-dG in SCC-7 cells treated with 1  $\mu$ M BPDE for 0.5 h, 1 h, 2 h and 3 h, respectively, according to representative extracted ion chromatogram of HPLC-ESI-LTQ-Orbitrap-MS. Error bars represent the standard deviation of triplicate experiments.
